# Supplementary material for: D-α-Tocopherol-Based Micelles for Successful Encapsulation of Retinoic Acid
Source: PubMed Central journal article supplement (PMC7999664; doi:10.3390/ph14030212), 2021-03-04
Supplement: pharmaceuticals-14-00212-s001.pdf [file pharmaceuticals-14-00212-s001.pdf]

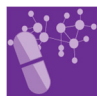

## Supplementary Information

# D- $\alpha$ -tocopherol-Based Polymeric Micelles for Successful Improving Encapsulation of Retinoic Acid

Guendalina Zuccari<sup>1,\*</sup>, Sara Baldassari<sup>1</sup>, Silvana Alfei<sup>1</sup>, Barbara Marengo<sup>2</sup>, Giulia Elda Valenti<sup>2</sup>, Cinzia Domenicotti<sup>2</sup>, Giorgia Ailuno<sup>1</sup>, Carla Villa<sup>1</sup>, Leonardo Marchitto<sup>3</sup>, and Gabriele Caviglioli<sup>1</sup>

<sup>1</sup>Department of Pharmacy (DiFAR), University of Genoa, Viale Cembrano 4, I-16148, Genova, Italy, zuccari@difar.unige.it, baldassari@difar.unige.it, [alfei@difar.unige.it](mailto:alfei@difar.unige.it), ailuno@difar.unige.it, villa@difar.unige.it, caviglioli@difar.unige.it

<sup>2</sup>Department of Experimental Medicine - DIMES, University of Genoa, Via Alberti L.B. 2 I- 16132 Genoa, Italy; barbara.marengo@unige.it; giuliaelda.valenti@edu.unige.it; cinzia.domenicotti@unige.it

<sup>3</sup>Department of Sciences for the Quality of Life, University of Bologna, Corso D'Augusto 237, Rimini, Italy, leonardo.marchitto@unibo.it

\* Correspondence: zuccari@difar.unige.it (G.Z.)

## Section S1. Figure S1-S15.

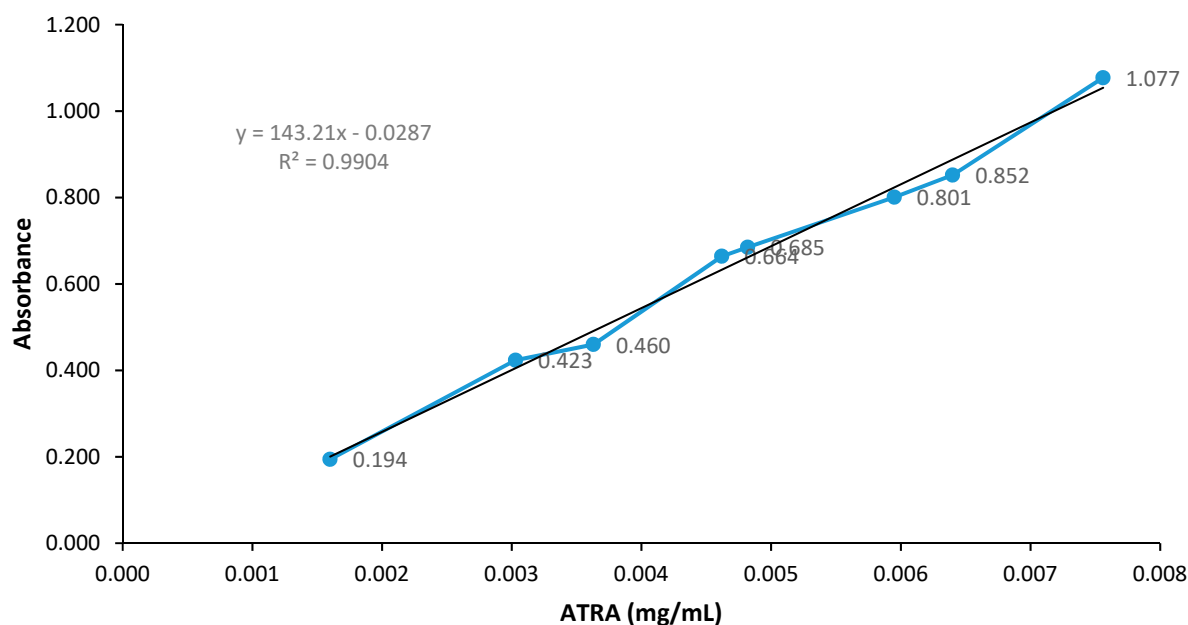

**Figure S1.** ATRA calibration curve in methanol at  $\lambda_{\max} = 340$  nm using an UV-Vis spectrophotometer within a range  $5.33 \times 10^{-3} - 2.13 \times 10^{-2}$   $\mu\text{M}$ .

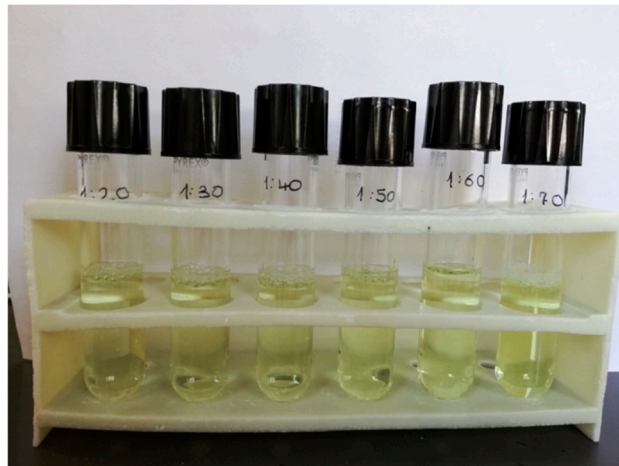

**Figure S2.** ATRA-TPGS colloidal dispersions obtained at different ATRA:TPGS ratios (w:w) by solvent casting method.

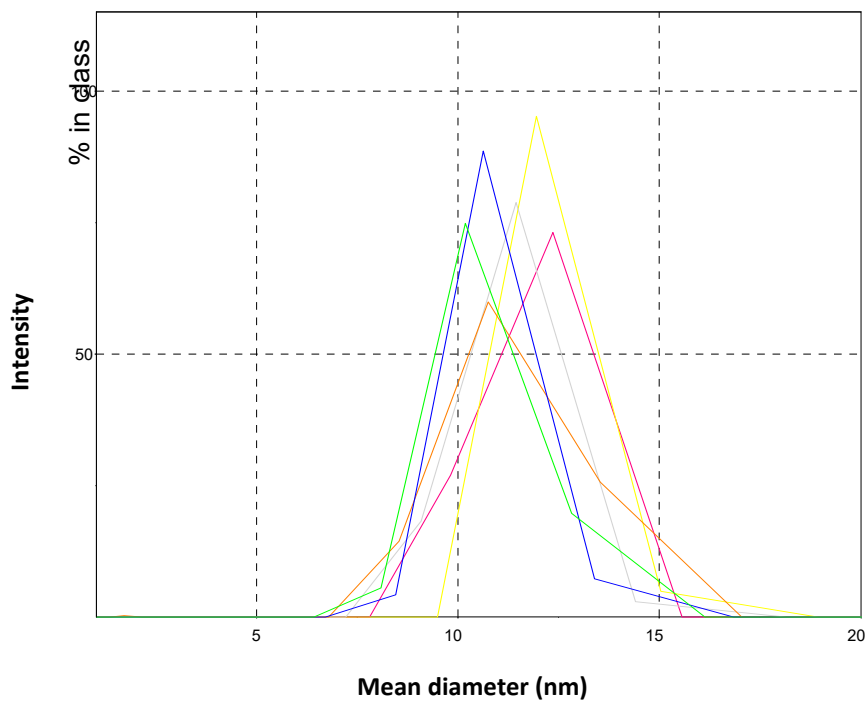

**Figure S3.** Representative size distribution of different freshly prepared ATRA-TPGS formulations. Green line corresponds to 1:70 ratio, blue line to 1:60 ratio, orange line to 1:50 ratio, grey line to 1:40 ratio, yellow line to 1:30 ratio and red line to 1:20 ratio.

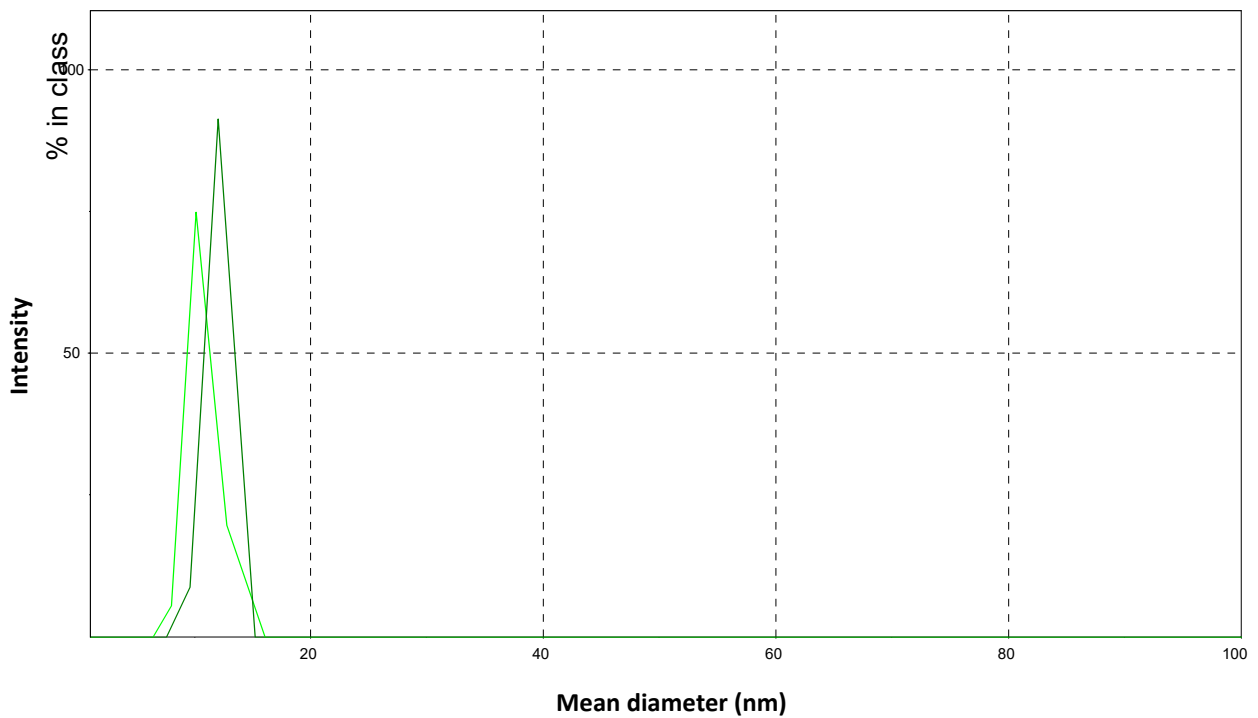

**Figure S4.** Representative size distribution of ATRA-TPGS formulation at 1:50 ratio. Light green line corresponds to a freshly prepared micellar dispersion, and green line to micelles reconstituted in water from lyophilized powder.

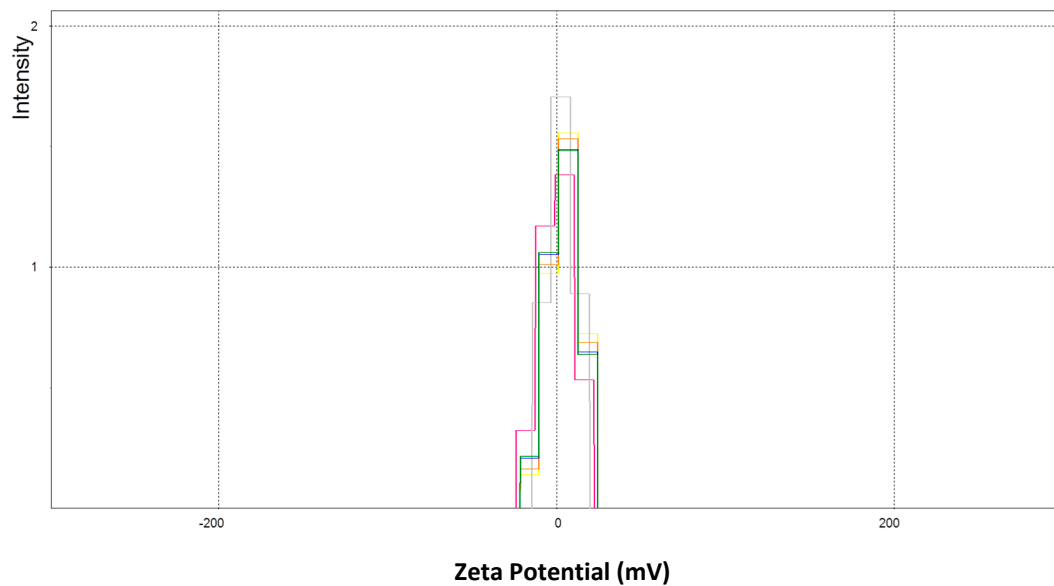

**Figure S5.** Representative Z potentials distribution of different ATRA-TPGS formulations measured in HEPES buffer (pH 7.4). Green line corresponds to 1:70 ratio, blue line to ratio 1:60, orange line to 1:50 ratio, grey line to 1:40 ratio, yellow line to 1:30 ratio and red line to 1:20 ratio.

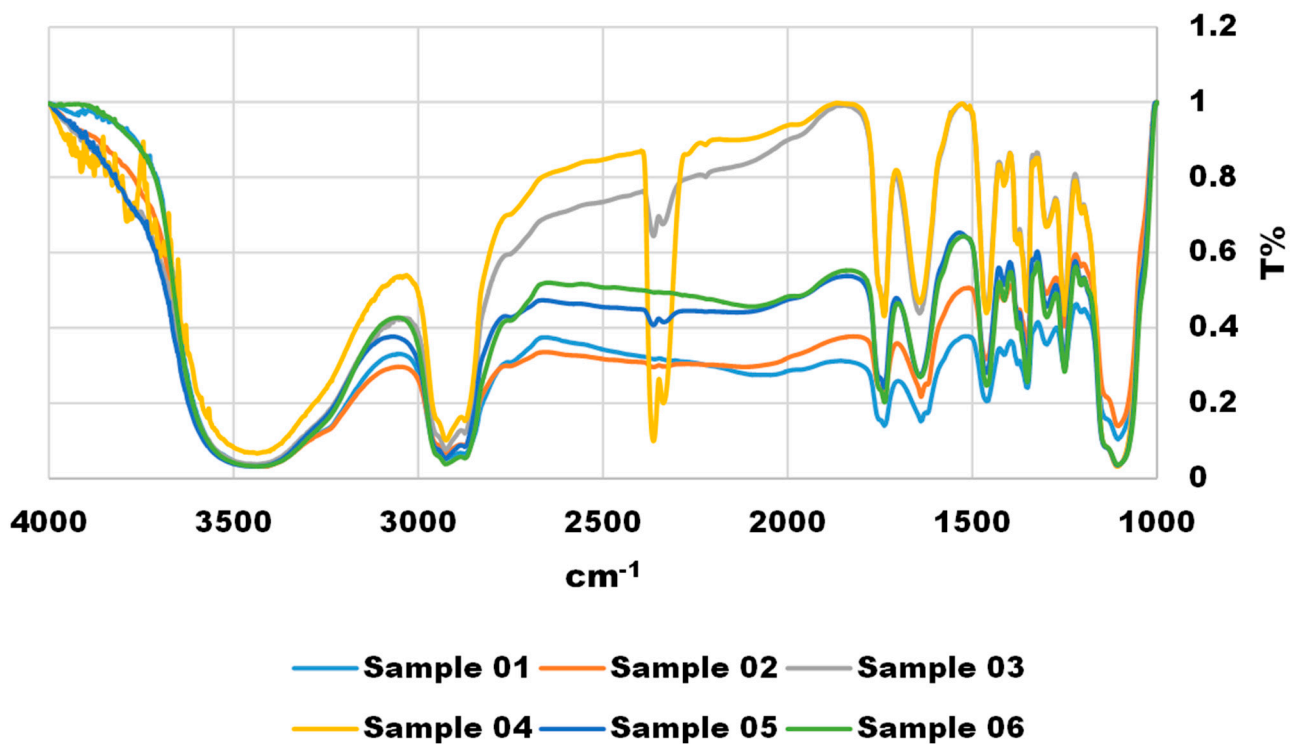

**Figure S6.** FTIR spectra of ATRA-TPGS formulations obtained using ATRA:TPGS ratios of 1:20, 1:30, 1:40, 1:50, 1:60 and 1:70 and named Sample 01, 02, 03, 04, 05 and 06 respectively.

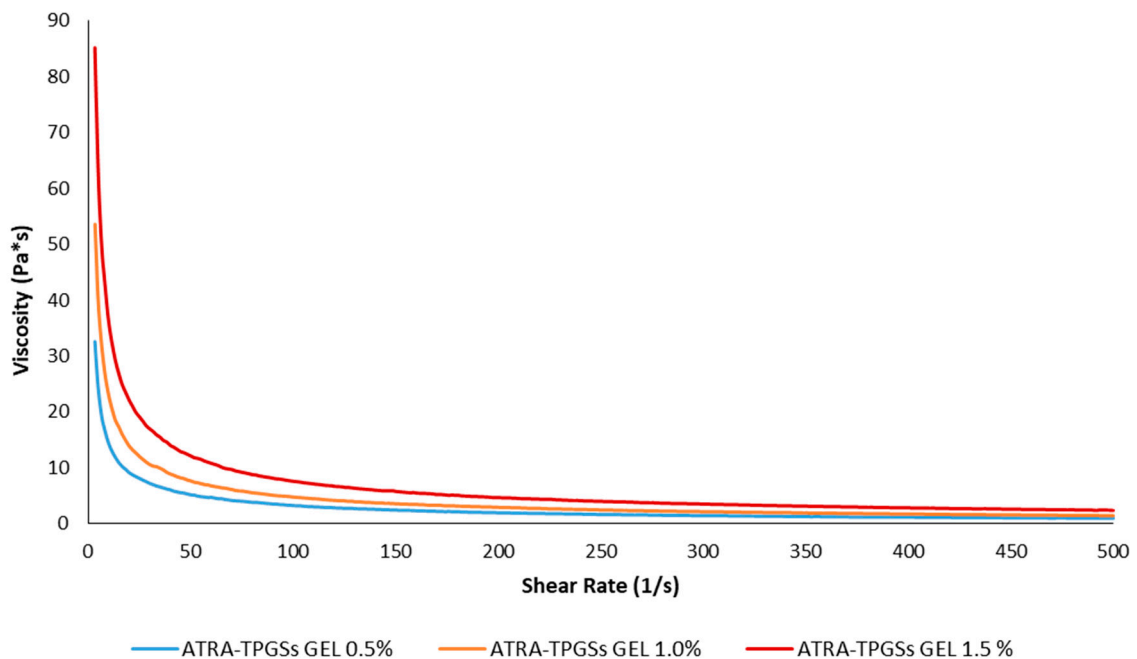

**Figure S7.** Viscosity curves of ATRA-TPGSs loaded gels at 0.5%, 1.0% and 1.5% (w/w) Carbopol® 980 concentrations, recorded at 25 °C using a concentric cylinder viscometer equipped with a Z4 probe.

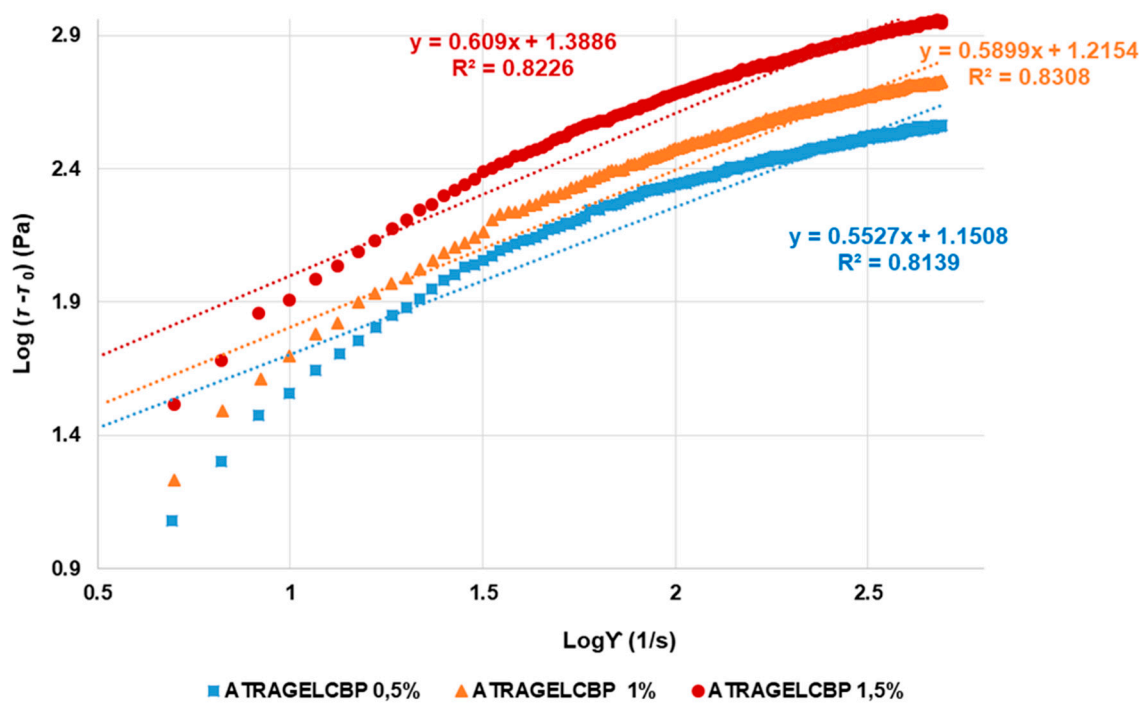

**Figure S8.** Hershel-Buckley rheograms of ATRA-TPGSs loaded gels at 0.5%, 1.0% and 1.5% (w/w) Carbopol® 980 concentrations.

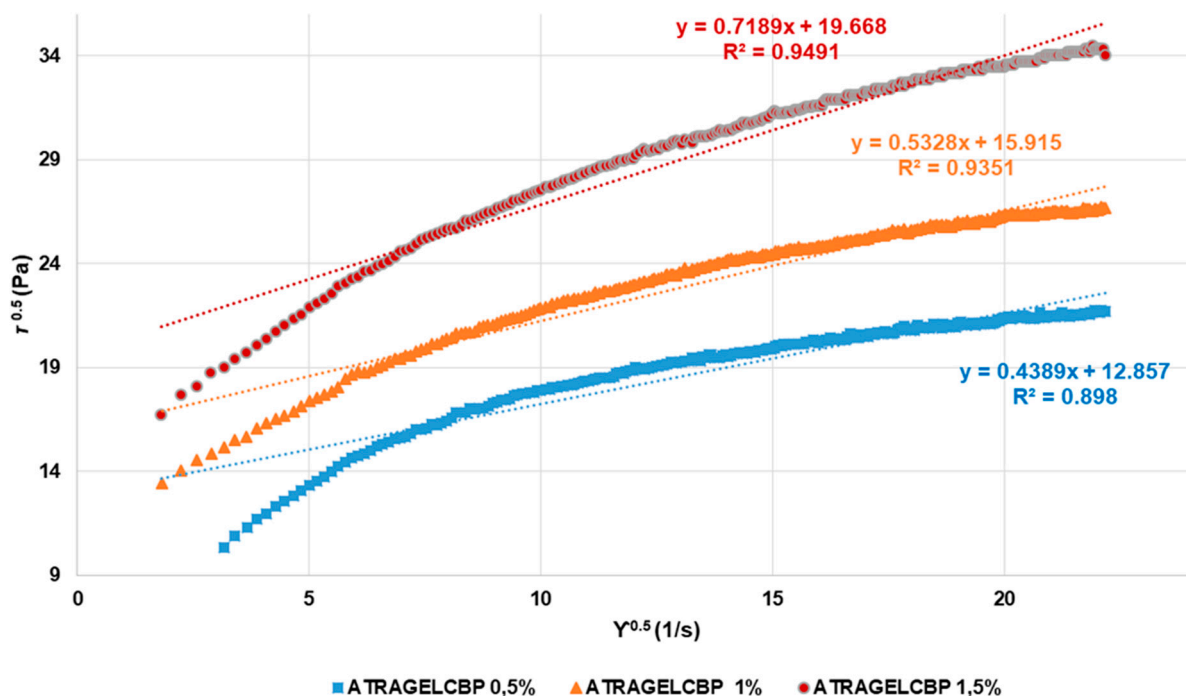

**Figure S9.** Casson rheograms of ATRA-TPGSs loaded gels at 0.5%, 1.0% and 1.5% (w/w) Carbopol® 980 concentrations.

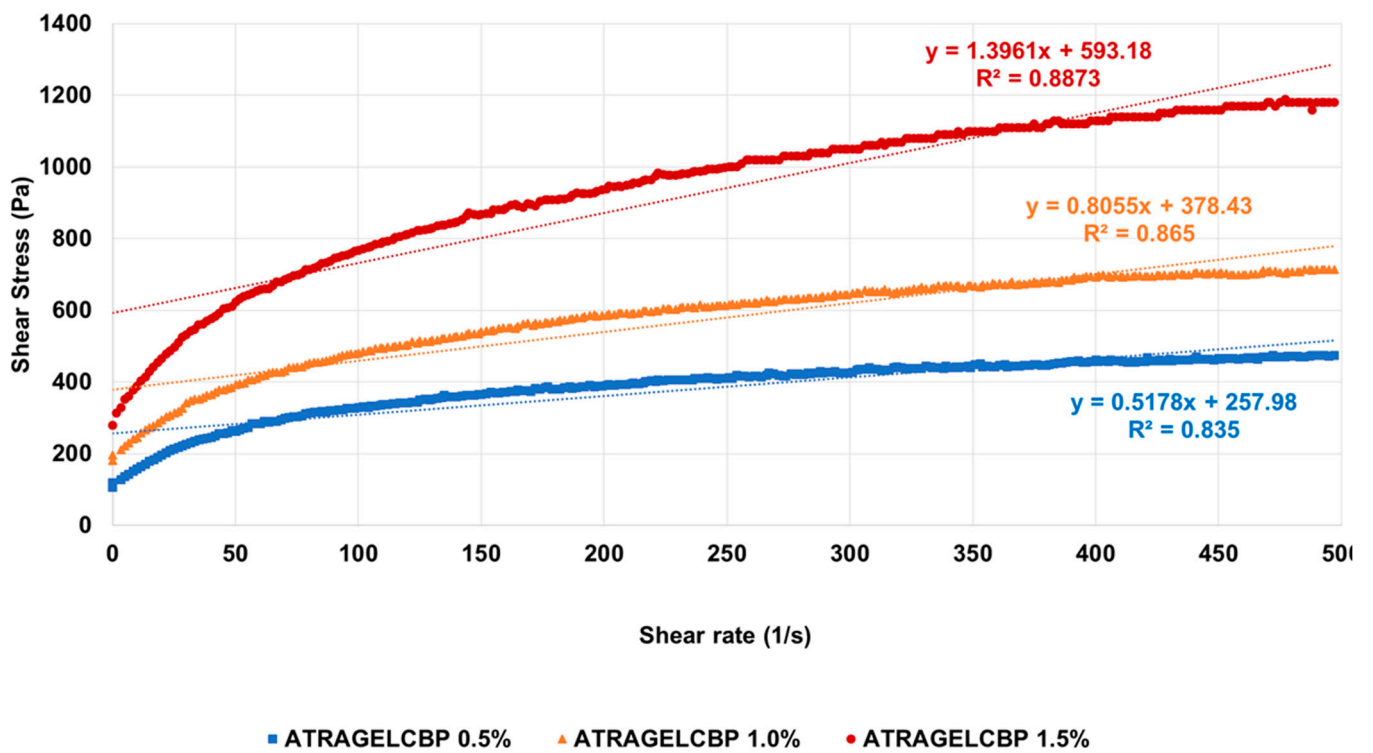

**Figure S10.** Bingham Plastic rheograms of ATRA-TPGSs loaded gels at 0.5%, 1.0% and 1.5% (w/w) Carbopol® 980 concentrations.

## Section 2. Table S1.

**Table S1.** Models parameters, i.e.  $n$  and  $nH$ ,  $k$  and  $kH$ ,  $\tau_{oc}$ ,  $\eta_{cp}$ ,  $\tau_o$  and  $\eta_p$ .

| Model            | $n$                 | $k$    | $\tau_{oH}$ | $\tau_{oc}$         | $\eta_{cp}$ | $\tau_o$            | $\eta_p$ |
|------------------|---------------------|--------|-------------|---------------------|-------------|---------------------|----------|
|                  | 0.2877 <sup>1</sup> | 83.04  |             |                     |             |                     |          |
| Power Law        | 0.2866 <sup>2</sup> | 124.94 |             |                     |             |                     |          |
|                  | 0.3015 <sup>3</sup> | 187.20 |             |                     |             |                     |          |
|                  | 0.5527 <sup>1</sup> | 14.15  | 107         |                     |             |                     |          |
| Herschel-Bulkley | 0.5899 <sup>2</sup> | 16.42  | 180         |                     |             |                     |          |
|                  | 0.6090 <sup>3</sup> | 24.47  | 280         |                     |             |                     |          |
|                  |                     |        |             | 165.30 <sup>1</sup> | 0.19        |                     |          |
| Casson           |                     |        |             | 253.61 <sup>2</sup> | 0.28        |                     |          |
|                  |                     |        |             | 386.83 <sup>3</sup> | 0.52        |                     |          |
|                  |                     |        |             |                     |             | 257.98 <sup>1</sup> | 0.5178   |
| Bingham Plastic  |                     |        |             |                     |             | 378.43 <sup>2</sup> | 0.8055   |
|                  |                     |        |             |                     |             | 593.18 <sup>3</sup> | 1.3961   |

<sup>1</sup> ATRA-TPGSs loaded gel with Carbopol <sup>1</sup> 0.5%, <sup>2</sup> 1.0%, <sup>3</sup> 1.5% (w/w).
